# Supplementary figures and images for: Lactobacillus paracasei L9 improves colitis by expanding butyrate-producing bacteria that inhibit the IL-6/STAT3 signaling pathway
Source: Royal Society of Chemistry journal article supplement (doi:10.1039/d1fo02077c), 2021-01-01

Figure S1.

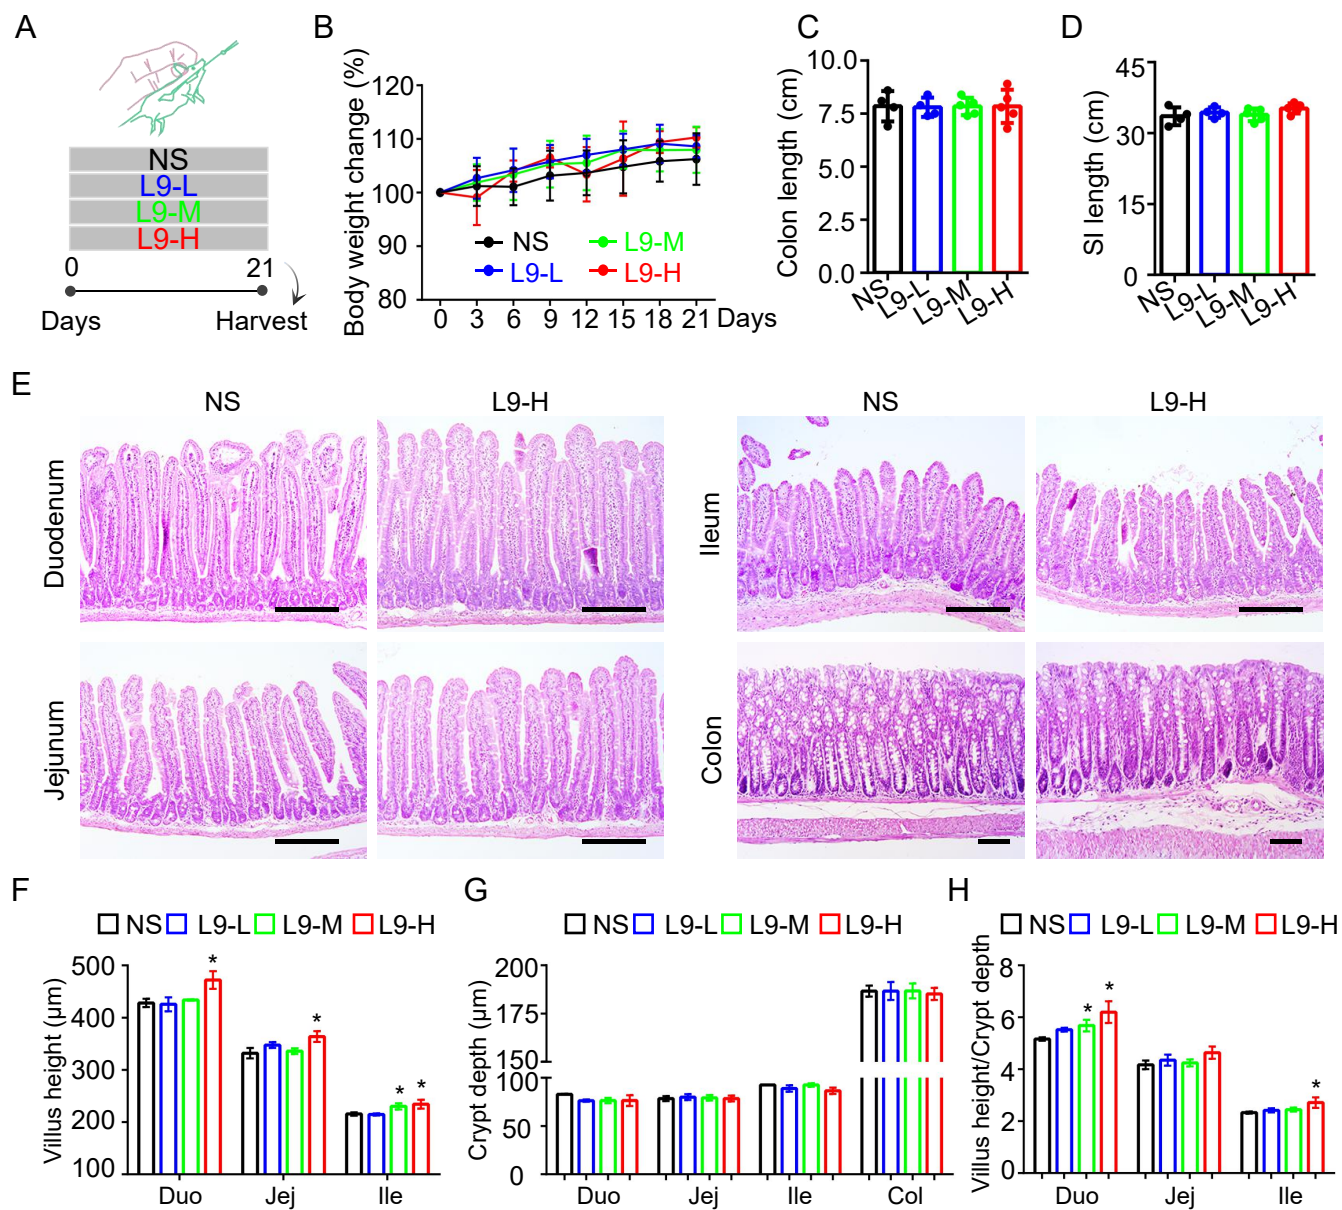

Figure S2

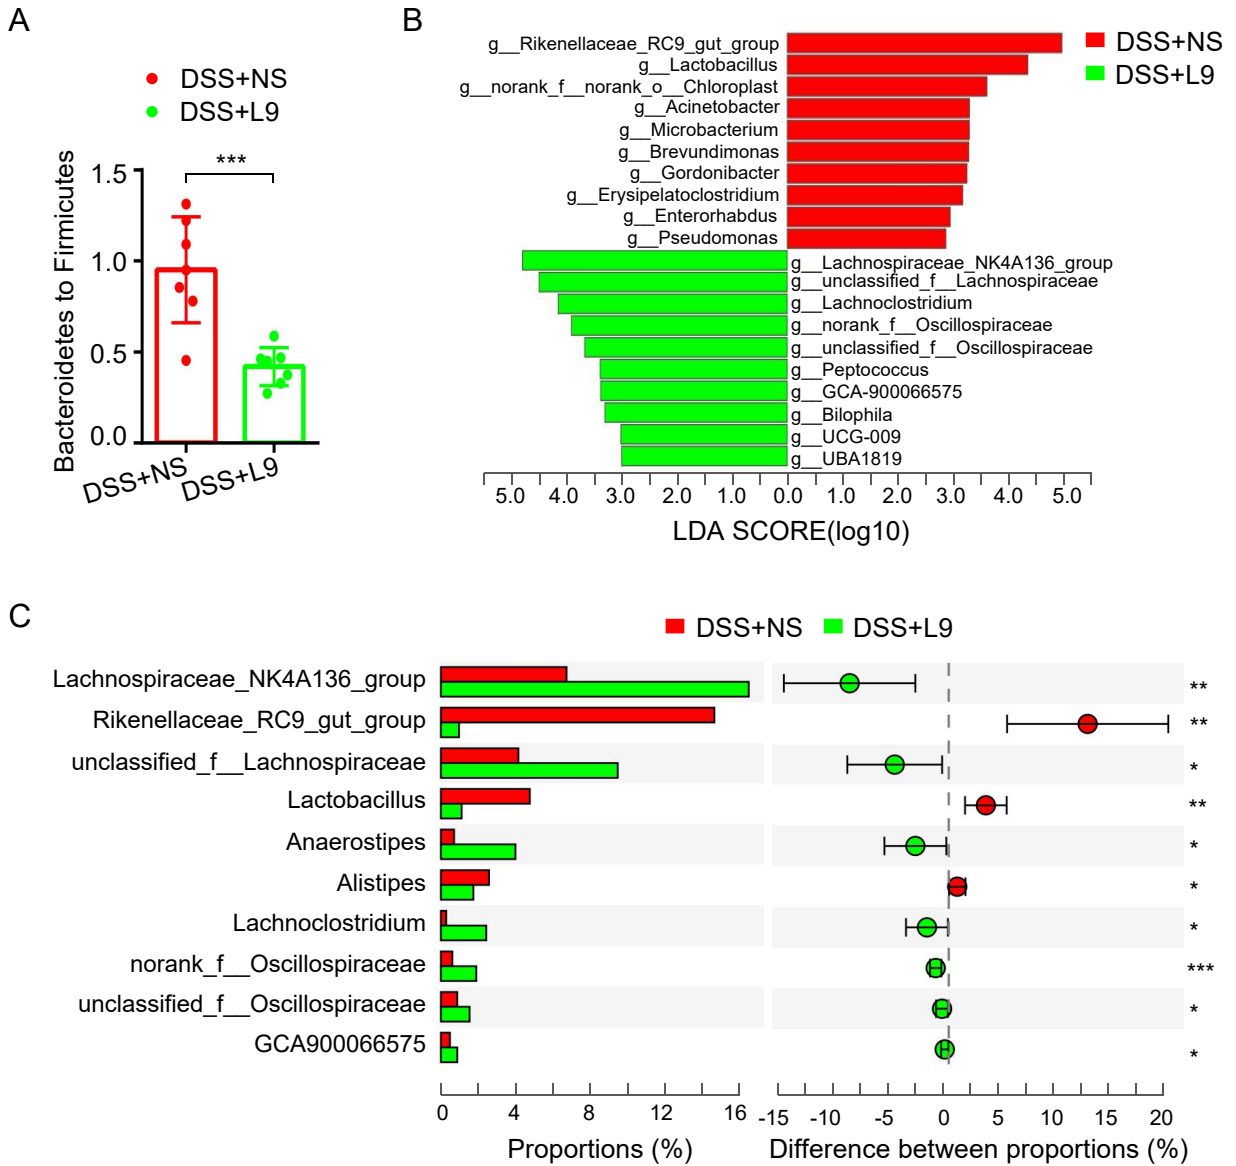

Supplement: d1fo02077c3.pdf [file d1fo02077c3.pdf]
